# Supplementary material for: Naming a Lego World. The Role of Language in the Acquisition of Abstract Concepts
Source: PubMed Central journal article supplement (PMC4309617; doi:10.1371/journal.pone.0114615), 2015-01-28
Supplement: pone.0114615.s001.pdf [file pone.0114615.s001.pdf]

**Table S1.** Labels and construction criteria of the concrete categories.

| <b>Novel labels</b> | <b>How the 1<sup>st</sup> exemplar was built</b>                                                    | <b>Other exemplars</b>                                                                                                                                                                                                                                                                         |
|---------------------|-----------------------------------------------------------------------------------------------------|------------------------------------------------------------------------------------------------------------------------------------------------------------------------------------------------------------------------------------------------------------------------------------------------|
| calona              | A blue jagged stack-shaped object with a yellow protrusion                                          | The other exemplars were built by: <ul style="list-style-type: none"> <li>• varying the main color: red, light-blue, green (3 exemplars)</li> <li>• reducing the number of bricks (2 exemplars)</li> <li>• varying the size of the yellow protrusion (3 exemplars)</li> </ul>                  |
| fusapo              | An object composed of two lateral striped parts (blue, red and black) joined by a yellow protrusion | The other exemplars were built by: <ul style="list-style-type: none"> <li>• varying the size of the yellow protrusion (2 exemplars)</li> <li>• varying the size of the lateral striped parts (2 exemplars)</li> <li>• inverting the color of the lateral striped parts (1 exemplar)</li> </ul> |
| banoto              | A yellow object with a hole in the middle, two lateral blue “wings” and two green parts in relief   | The other exemplars were built by: <ul style="list-style-type: none"> <li>• varying the size of the bricks (3 exemplars)</li> <li>• varying the color of the body (3 exemplars)</li> </ul>                                                                                                     |
| latofa              | A zig-zagged object, half blue and half yellow, with an orange piece on top                         | The other exemplars were built by: <ul style="list-style-type: none"> <li>• varying the size of the bricks (2 exemplars)</li> <li>• varying the color of the zig-zagged parts (3 exemplars)</li> </ul>                                                                                         |
| panifa              | An object made of two L-shaped parts, one yellow and one blue                                       | The other exemplars were built by: <ul style="list-style-type: none"> <li>• varying the size of the bricks (3 exemplars)</li> <li>• varying the reciprocal orientation of the L-shaped parts (3 exemplars)</li> </ul>                                                                          |
| norolo              | A light-blue L-shaped part placed on an orange base                                                 | The other exemplars were built by: <ul style="list-style-type: none"> <li>• varying the size of the bricks (3 exemplars)</li> <li>• varying the color of the base: green and red (3 exemplars)</li> </ul>                                                                                      |
