# Supplementary material for: Naming a Lego World. The Role of Language in the Acquisition of Abstract Concepts
Source: PubMed Central journal article supplement (PMC4309617; doi:10.1371/journal.pone.0114615), 2015-01-28
Supplement: pone.0114615.s002.pdf [file pone.0114615.s002.pdf]

**Table S2.** Labels and construction criteria of the abstract categories.

| <b>Novel labels</b> | <b>How the 1<sup>st</sup> exemplar was built</b>                                                | <b>Other exemplars</b>                                                                                                                                                                                                                                                                                                                            |
|---------------------|-------------------------------------------------------------------------------------------------|---------------------------------------------------------------------------------------------------------------------------------------------------------------------------------------------------------------------------------------------------------------------------------------------------------------------------------------------------|
| gaveba              | two concrete objects (a fusapo and a calona) have one contact point and form a concavity        | The other exemplars were built by varying: <ul style="list-style-type: none"> <li>the component objects: <ul style="list-style-type: none"> <li>calona + filler1</li> <li>filler1 + norolo</li> <li>filler1 + filler2</li> </ul> </li> <li>the concavity angle (3 exemplars)</li> <li>the concavity orientation (1 exemplar)</li> </ul>           |
| mozese              | two concrete objects (a fusapo and a banoto) have two contact points                            | The other exemplars were built by varying: <ul style="list-style-type: none"> <li>the component objects: <ul style="list-style-type: none"> <li>fusapo + filler 2</li> <li>banoto + filler 2</li> <li>calona + filler 3</li> </ul> </li> <li>the orientation of the concrete objects (3 exemplars)</li> </ul>                                     |
| necoto              | A vertical concrete object (a panifa) is above a horizontal object (a latofo) without contact   | The other exemplars were built by varying the component objects: <ul style="list-style-type: none"> <li>panifa + filler 4</li> <li>calona + filler 4</li> <li>filler 1 + filler 3</li> </ul>                                                                                                                                                      |
| ravelo              | Two concrete objects (a banoto and a filler 1) in contact are above another object (a filler 4) | The other exemplars were built by varying: <ul style="list-style-type: none"> <li>the component objects: <ul style="list-style-type: none"> <li>filler 3 + banoto + filler 2</li> <li>panifa + filler 3 + filler 4</li> <li>norolo + filler 1 + filler 3</li> </ul> </li> <li>the inclination of the component objects (2 exemplars)</li> </ul>   |
| sopano              | Two vertical objects (two fillers 4) are above a horizontal object (a latofo)                   | The other exemplars were built by varying: <ul style="list-style-type: none"> <li>the component objects: <ul style="list-style-type: none"> <li>filler 4 + filler 1 + latofo</li> <li>fusapo + filler 1 + filler 4</li> <li>filler 1 + filler 4 + filler 1</li> </ul> </li> <li>the orientation of the component objects (3 exemplars)</li> </ul> |
| mifeso              | A vertical object (a norolo) is above another vertical object (a filler 4) without contact      | The other exemplars were built by varying: <ul style="list-style-type: none"> <li>the component objects: <ul style="list-style-type: none"> <li>panifa + norolo</li> <li>filler 1 + latofo</li> <li>filler 4 + filler 1</li> </ul> </li> <li>the orientation of the component objects (2 exemplars)</li> </ul>                                    |
