# Supplementary material for: Naming a Lego World. The Role of Language in the Acquisition of Abstract Concepts
Source: PubMed Central journal article supplement (PMC4309617; doi:10.1371/journal.pone.0114615), 2015-01-28
Supplement: pone.0114615.s003.pdf [file pone.0114615.s003.pdf]

**Table S3.** Descriptions of the concrete and abstract categories.

| Set 1  | Set 2  | Concrete descriptions                                                                                                                                                       | Abstract descriptions                                                                                                                                      |
|--------|--------|-----------------------------------------------------------------------------------------------------------------------------------------------------------------------------|------------------------------------------------------------------------------------------------------------------------------------------------------------|
| calona | gaveba | A jagged stack-shaped object with a yellow protrusion<br>[It.: Un oggetto a forma di pila sfalsata di mattoncini con una sporgenza gialla]                                  | The two objects have one contact point and form a concavity<br>[It: I due oggetti si toccano in un punto e formano una concavità]                          |
| fusapo | mozese | An object composed of two lateral striped parts joined by a yellow protrusion<br>[It: Un oggetto composto da due parti laterali a strisce unite da una protuberanza gialla] | The two objects have two contact points<br>[It: I due oggetti si toccano in due punti]                                                                     |
| banoto | necoto | An object with a hole in the middle and two green parts in relief<br>[It: Un oggetto che ha un buco al centro e due rilievi verdi]                                          | The vertical object is above the horizontal object without contact<br>[It: L'oggetto in verticale è sopra l'oggetto in orizzontale senza contatto]         |
| latofa | ravelo | A zig-zagged object with an orange piece on top<br>[It: Un oggetto a forma di zigzag con un pezzo arancione in cima]                                                        | The two objects in contact are above another object<br>[It: I due oggetti che si toccano sono sopra un altro oggetto]                                      |
| panifa | sopano | An object made of two L-shaped parts, one yellow and one blue<br>[It: Un oggetto composto da due parti a forma di elle, una gialla e una blu]                               | The two vertical objects are above the horizontal object<br>[It: I due oggetti in verticale sono sopra l'oggetto in orizzontale]                           |
| norolo | mifeso | A light-blue L-shaped object placed on a base<br>[It: Un oggetto a forma di una elle celeste poggiata su una base]                                                          | The vertical object is above the other vertical object without contact<br>[It: L'oggetto in verticale è sopra l'altro oggetto in verticale senza contatto] |
